# Supplementary material
Source: PubMed Central journal article supplement (PMC4498145)
Supplement: supp_ptj.20140234_2014-0234.pdf [file supp_ptj.20140234_2014-0234.pdf]

## Longitudinal Evaluation of Muscle Composition Using Magnetic Resonance

### eTable.

#### Participant Demographics<sup>a</sup>

| Participant | Age (y) | Height (m) | Weight (kg) | BMI (kg/m <sup>2</sup> ) | Genetic Mutation    | Steroid Type and Dose    | Ideal Dose <sup>5,39,41</sup> | Steroid Start Age (y) |
|-------------|---------|------------|-------------|--------------------------|---------------------|--------------------------|-------------------------------|-----------------------|
| DMD 8A      | 8.1     | 1.26       | 23.2        | 14.6                     | Exon 46-50 deletion | Deflazacort 22.5 mg OD   | 20.9 mg                       | 7.0                   |
| DMD 8B      | 8.9     | 1.26       | 28.2        | 31.2                     | Exon 10-17 deletion | Deflazacort 30 mg OD     | 25.4 mg                       | 5.5                   |
| DMD 11      | 11.7    | 1.31       | 31.6        | 18.4                     | Exon 3-7 deletion   | Deflazacort 12 mg OD BID | 28.4 mg                       | 6.0                   |
| DMD 13      | 13.9    | 1.31       | 42.3        | 24.9                     | Exon 46-47 deletion | Prednisone 20 mg OD      | 31.7 mg                       | 7.0                   |
| C 8A        | 8.3     | 1.26       | 22.7        | 14.4                     | N/A                 | N/A                      | N/A                           | N/A                   |
| C 9B        | 9.5     | 1.34       | 28.8        | 16.0                     | N/A                 | N/A                      | N/A                           | N/A                   |
| C 11        | 11.9    | 1.47       | 42.3        | 19.5                     | N/A                 | N/A                      | N/A                           | N/A                   |
| C 12        | 12.3    | 1.58       | 43.6        | 17.0                     | N/A                 | N/A                      | N/A                           | N/A                   |

<sup>a</sup> Values shown in the table were taken at baseline measurement for all participants. Numbers in the "Participant" column indicate each boy's age at baseline (expressed as year.month). DMD=Duchenne muscular dystrophy, C=healthy control, OD=oral dose, BID=twice daily, BMI=body mass index, N/A=not applicable.
